# Supplementary material for: Synthesis of cadmium oxide and carbon nanotube based nanocomposites and their use as a sensing interface for xanthine detection
Source: Royal Society of Chemistry journal article supplement (doi:10.1039/c5ra00050e), 2015-01-01

**Supplementary Fig. 1.** Effects of pH (A), temperature (B) and time (C) on the electrochemical response of fabricated xanthine biosensor based on XOD/CdO-NPs/c-MWCNT/Au electrode.

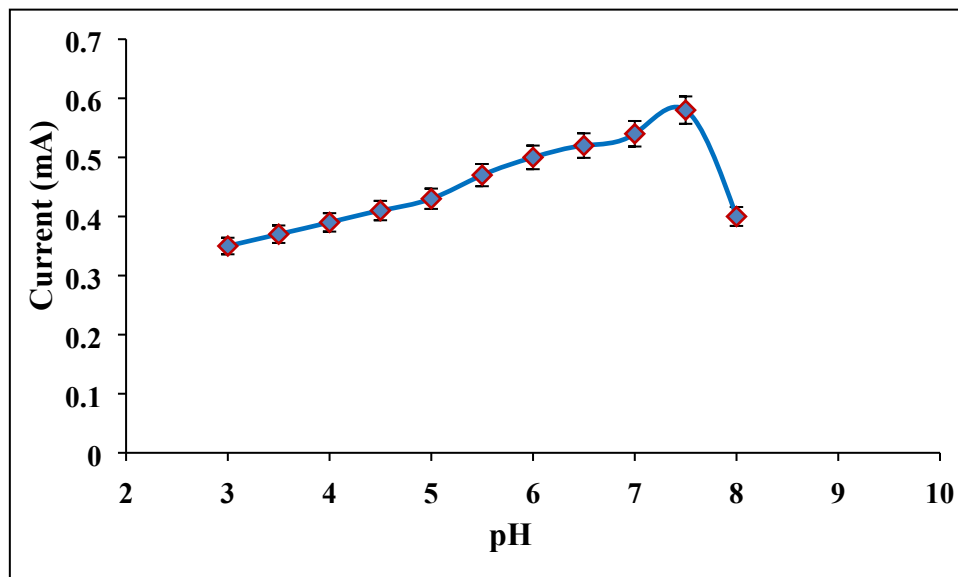

(A)

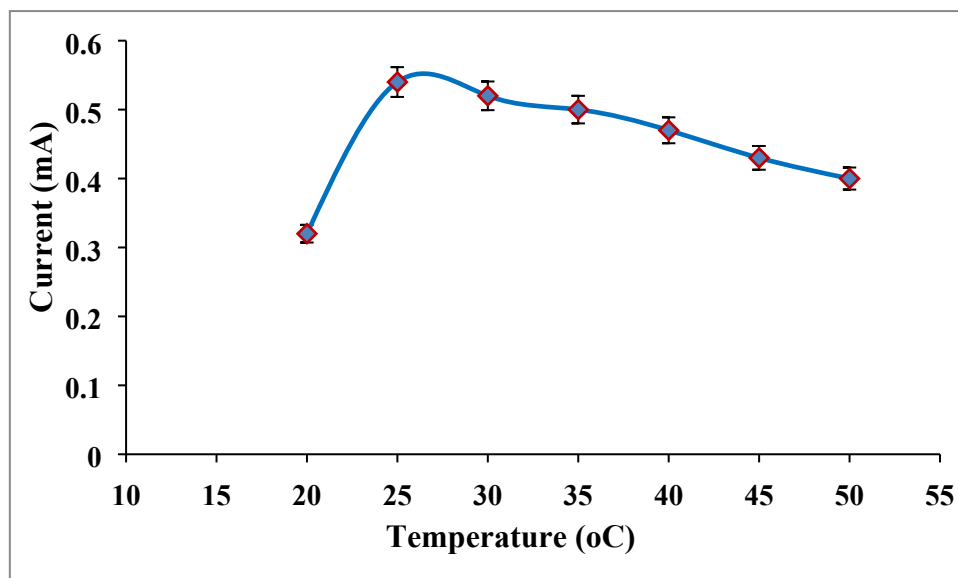

(B)

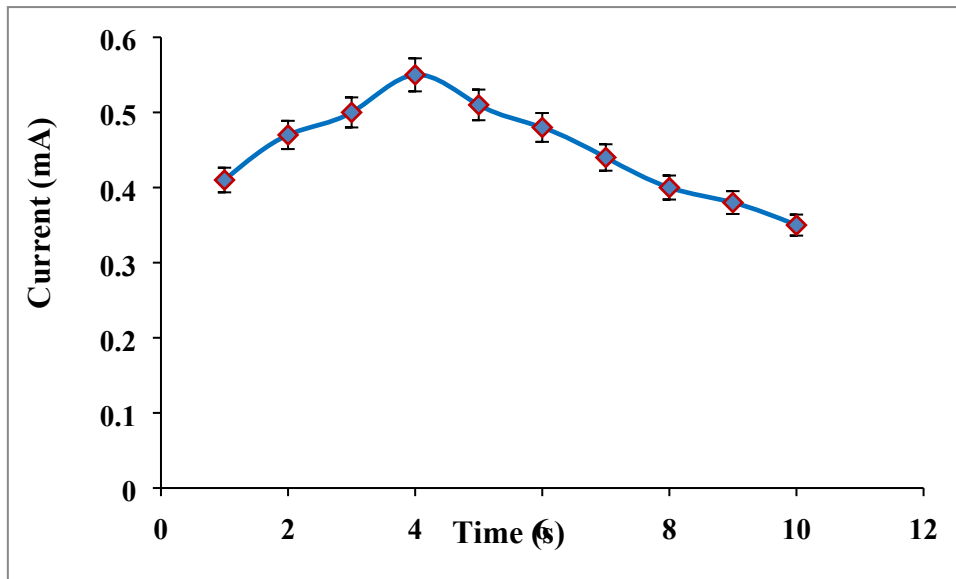

(C)

**Supplementary Fig. 2.** Correlation between fish meat extract (mg/l) determinations by standard enzymic colorimetric method (x) and present biosensor method (y).

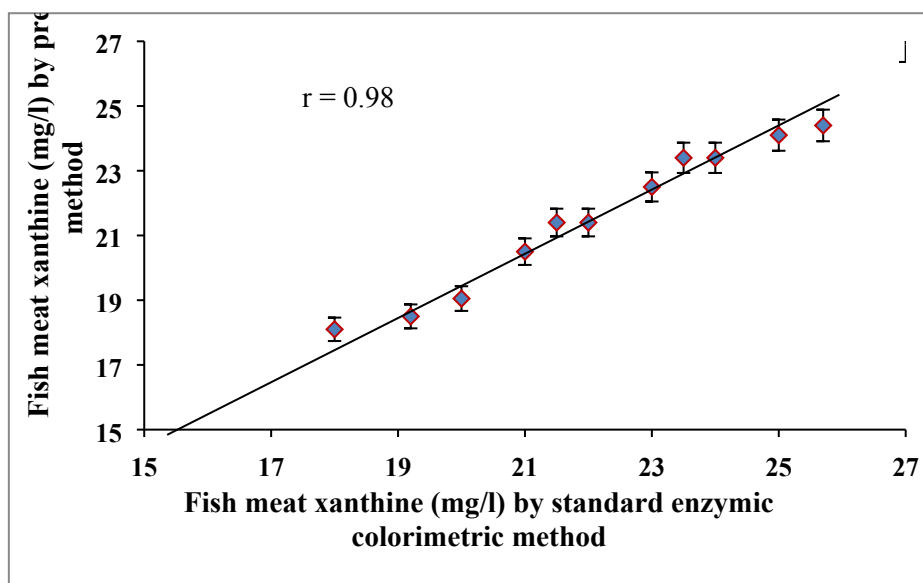

Supplement: c5ra00050e1.pdf [file c5ra00050e1.pdf]
